# Supplementary material for: Traumatic Brain Injury Induces Tau Aggregation and Spreading
Source: PubMed Central journal article supplement (PMC6921297; doi:10.1089/neu.2018.6348), 2019-12-11
Supplement: Supp_FigureS1.pdf [file Supp_FigureS1.pdf]

## Supplementary Data

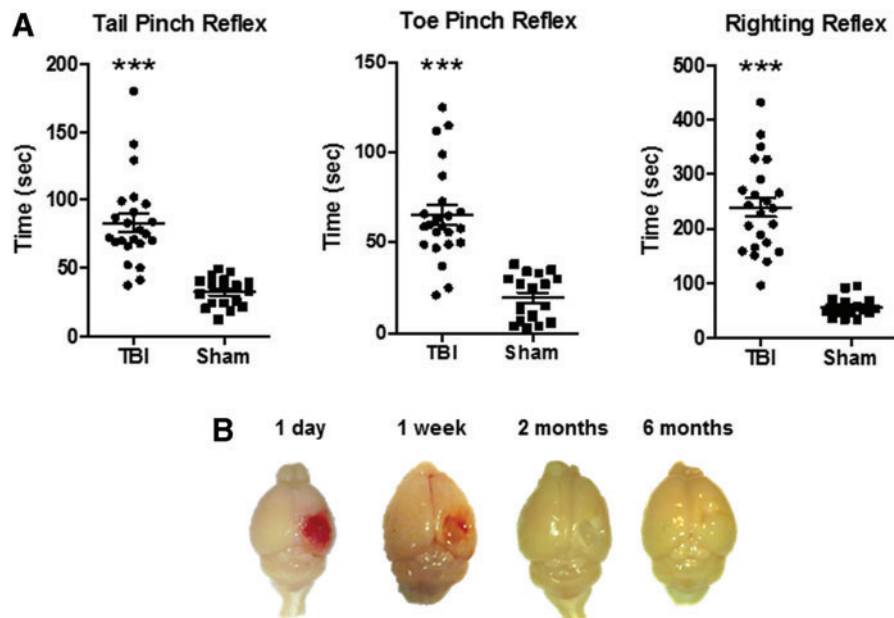

**SUPPLEMENTARY FIG. S1.** Traumatic brain injury (TBI)-associated impaired function and brain damage. **(A)** Mice were tested for somatosensory functions immediately after controlled cortical impact (CCI) or sham surgery by Mann-Whitney test ( $***p < 0.001$ ). **(B)** Representative images of brain damage after CCI over the right parietal cortex in mice after one day, one week, two months, and six months post-operation are shown. Hematoma and edema are indicated transiently after impact, thereby forming a collapsed 1 mm deformation in brain at later stages.
